# Supplementary material for: Exome sequencing in large, multiplex bipolar disorder families from Cuba
Source: PLoS One. 2018 Oct 31;13(10):e0205895. doi: 10.1371/journal.pone.0205895 (PMC6209204; doi:10.1371/journal.pone.0205895)
Supplement: S1 Table — Overview of bipolar disorder (BD) subtype and psychosis-status of the investigated individuals. Age-at-onset is reported in 5-year intervals. (XLSX) [file pone.0205895.s001.xlsx]

## Sheet: Tabelle1
pedigree	individual	BD subtype	psychosis	age-at-onset
1	4	BD I	yes	26-30
1	5	BD I	yes	16-20
1	7	BD I	yes	26-30
1	9	BD NOS	no	31-35
2	1	BD II	no	36-40
2 / 4	2	BD I	yes	46-50
3 / 4	3	BD II	no	56-60
3	5	BD II	no	26-30
2	9	BD II	no	11-15
2	10	BD I	yes	36-40
4	11	BD II	no	11-15
4	12	BD I	yes	11-15
4	14	BD II	no	26-30
4	15	BD I	yes	21-25
3	16	BD II	no	21-25
